# Supplementary material for: MicroRNA-3713 regulates bladder cell invasion via MMP9
Source: PubMed Central journal article supplement (PMC5006037; doi:10.1038/srep32374), 2016-08-31
Supplement: srep32374-s1.pdf [file srep32374-s1.pdf]

## **MicroRNA-3713 regulates bladder cell invasion via MMP9**

Wen-Bo Wu<sup>1&</sup>, Wei Wang<sup>1&</sup>, Yi-Heng Du<sup>1</sup>, Hao Li<sup>1</sup>, Shu-Jie Xia<sup>1</sup>, Hai-Tao Liu<sup>12\*</sup>

1 Department of Urology, Shanghai General Hospital, Shanghai Jiao Tong University School of Medicine, Shanghai 200080, China.

2 Department of Urology, Kashgar Prefecture Second People's Hospital, Kashgar 844000, China

& Wen-Bo Wu and Wei Wang contributed equally to this work.

\* Correspondence: Hai-Tao Liu: 1 Department of Urology, Shanghai General Hospital, Shanghai Jiao Tong University, 100 Haining Rd, Shanghai 200080, China. 2 Department of Urology, Kashgar Prefecture Second People's Hospital, Kashgar 844000, China. Tel: +862163240090, Email: [liuhaitao4@163.com](mailto:liuhaitao4@163.com)

**Run title:** miR-3713 inhibits TCC via MMP9

**Supplementary table 1: Prediction of human MMP9-binding miRNAs by Bioinformatics**

| predicted miRNAs | position at MMP9 3'-UTR | site-type contribution | 3' pairing contribution | local AU contribution | position contribution | TA contribution | SPS contribution | context+ score |
|------------------|-------------------------|------------------------|-------------------------|-----------------------|-----------------------|-----------------|------------------|----------------|
| hsa-miR-3713     | 73-80bp                 | -0.247                 | 0.003                   | 0.055                 | -0.096                | -0.083          | -0.024           | -0.39          |
| hsa-miR-1224-3p  | 117-123bp               | -0.12                  | -0.044                  | 0.083                 | -0.052                | 0.023           | -0.079           | -0.19          |
| hsa-miR-4690-3p  | 120-126bp               | -0.12                  | -0.007                  | 0.102                 | -0.052                | 0.016           | -0.08            | -0.21          |
| hsa-miR-3123     | 179-186bp               | -0.247                 | -0.018                  | 0.021                 | -0.112                | 0.031           | 0.072            | -0.25          |
| hsa-miR-183      | 25-31bp                 | -0.074                 | 0.001                   | 0.034                 | -0.047                | 0.002           | -0.014           | -0.1           |
| hsa-miR-4802-3p  | 26-32bp                 | -0.074                 | 0.001                   | 0.047                 | -0.047                | 0.007           | 0.03             | -0.04          |
| hsa-miR-4666-5p  | 43-49bp                 | -0.12                  | 0.021                   | 0.093                 | -0.056                | -0.013          | -0.034           | -0.11          |
| hsa-miR-133b     | 43-49bp                 | -0.12                  | 0.021                   | 0.093                 | -0.056                | -0.013          | -0.034           | -0.11          |
| hsa-miR-133a     | 47-53bp                 | -0.12                  | 0.003                   | 0.098                 | -0.055                | -0.018          | -0.028           | -0.12          |
| hsa-miR-296-3p   | 56-62bp                 | -0.074                 | -0.006                  | 0.05                  | -0.044                | 0.026           | -0.048           | -0.1           |
| hsa-miR-3667-3p  | 58-64bp                 | -0.12                  | -0.025                  | 0.081                 | -0.054                | 0.003           | -0.033           | -0.15          |
| hsa-miR-4448     | 61-67bp                 | -0.12                  | 0.003                   | 0.025                 | -0.053                | 0.016           | -0.069           | -0.15          |
| hsa-miR-149      | 62-68bp                 | -0.12                  | -0.007                  | 0.057                 | -0.053                | -0.008          | -0.047           | -0.16          |
| hsa-miR-892b     | 67-73bp                 | -0.12                  | 0.012                   | 0.033                 | -0.052                | 0.01            | -0.016           | -0.13          |

The site-type contribution reflects the average contribution of each site type. The 3' pairing contribution reflects consequential miRNA-target complementarity outside the seed region. The local AU content reflects the transcript AU content 30 nt upstream and downstream of predicted site. The position contribution reflects the distance to the nearest end of the annotated UTR of the target gene. The target site abundance contribution (TA) to context+ score reflects the abundance of target sites of a miRNA family in the set of distinct 3' UTRs. The seed-pairing stability contribution (SPS) to context+ score reflects the stability of a miRNA-target duplex, which is a function of the concentration of (A+U) in the seed region. The context+ score for a specific site is the sum of the contribution of 6 features [including site-type contribution, 3' pairing contribution, local AU contribution, position contribution, TA contribution and SPS contribution]. For each predicted target of each miRNA, the sum of the context+ scores for the sites to that miRNA was calculated as the total context+ score. Predicted targets of each miRNA family are sorted by total context+ score. The representative miRNA is the miRNA in its family with the most favorable (lowest) total context+ score. From the 4 candidates [with the highest score \(in blue\)](#), only miR-3713 was detected in human TCC specimens and paired non-tumor tissue. The other 3 microRNAs were not expressed.
